# Supplementary material
Source: Springer Nature journal article supplement (https://www.springermedizin.de/resource/supplementary/12913_2012_2398_MOESM2_ESM.pdf/9530546)

*Social structure*

*Recursive requirements of resources*

*Approaches to work*

*Functions of dispensing*

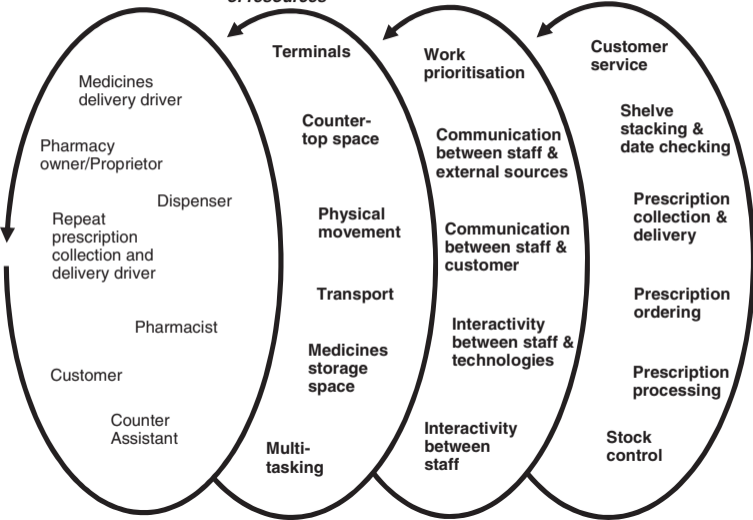

Supplement: MOESM2 [file 9530546]
